# Supplementary material for: Autonomous wearable sweat rate monitoring based on digitized microbubble detection
Source: Royal Society of Chemistry journal article supplement (doi:10.1039/d2lc00670g), 2022-01-01
Supplement: d2lc00670g1.pdf [file d2lc00670g1.pdf]

Supplementary Information:

**Autonomous wearable sweat rate monitoring based on digitized microbubble detection**

Haisong Lin<sup>‡\*ab</sup>, Wenzhuo Yu<sup>‡a</sup>, Jorge Emiliano De Dios Suarez<sup>a</sup>, Harish Athavan<sup>a</sup>, Yibo Wang<sup>a</sup>, Chris Yeung<sup>c</sup>,

Shuyu Lin<sup>a</sup>, Sriram Sankararaman<sup>d</sup>, Carlos Milla<sup>c</sup>, Sam Emaminejad<sup>\*a</sup>

<sup>a</sup>Department of Electrical and Computer Engineering, UCLA

<sup>b</sup>Department of Mechanical Engineering, University of Hong Kong

<sup>c</sup>Department of Material Science and Engineering, UCLA

<sup>d</sup>Department of Computer Science, UCLA

<sup>e</sup>Stanford School of Medicine, Stanford University

<sup>‡</sup>These authors contributed equally: Haisong Lin, Wenzhuo Yu

<sup>\*</sup>Corresponding author: emaminejad@ucla.edu; linhs@hku.hk

## Supplementary Figures:

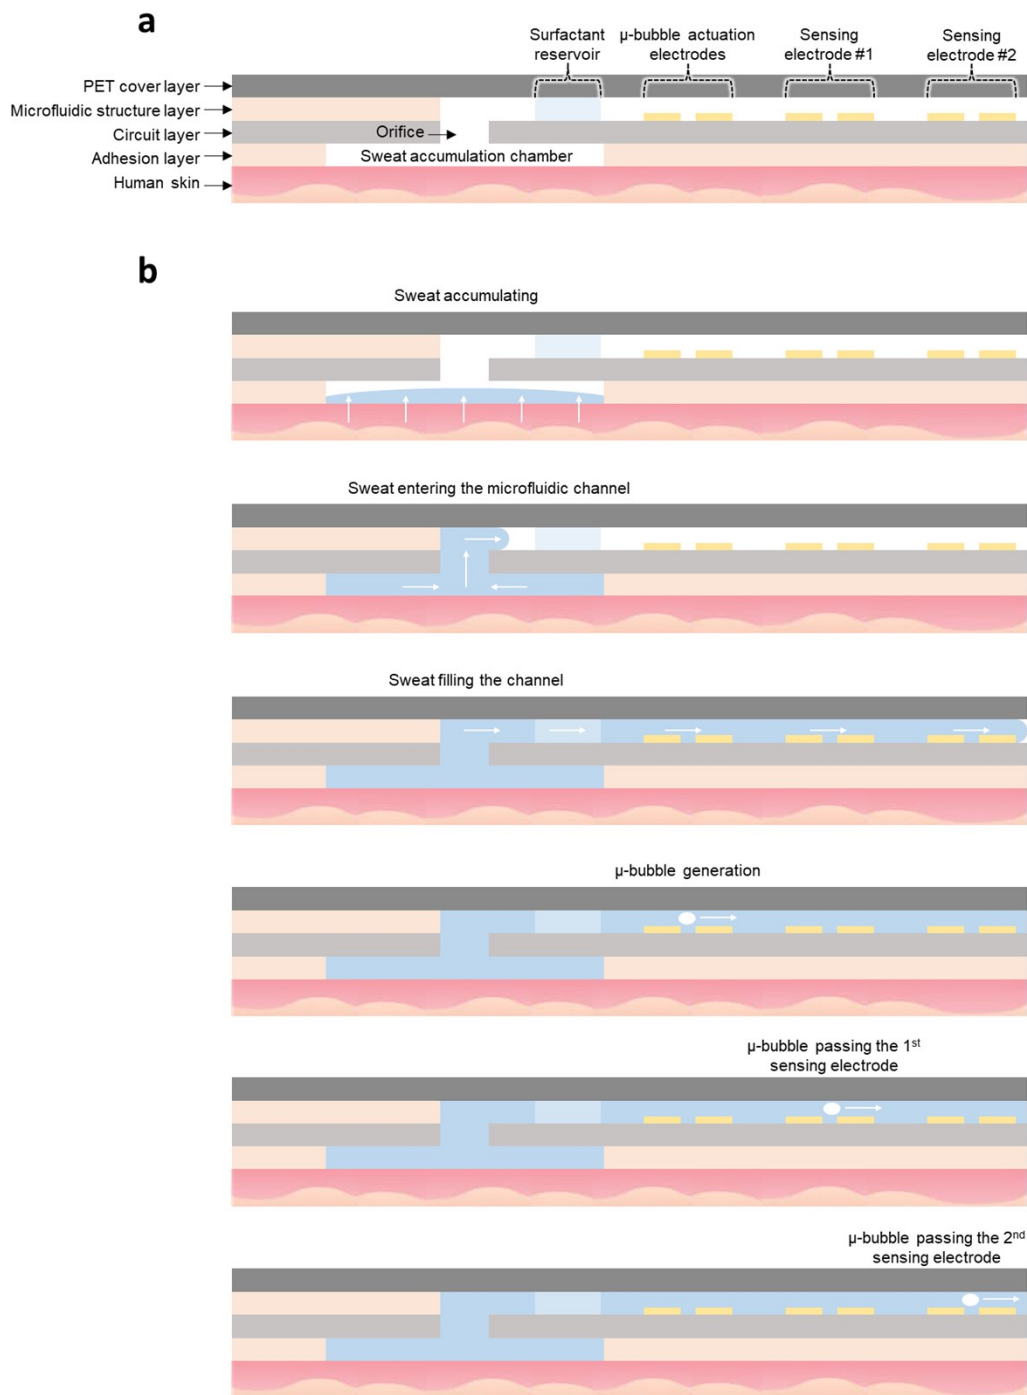

**Supplementary Fig. 1.** a) Cross-view schematic of the device-epidermal interface. b) Overview of the sweat collection and sweat rate sensing process.

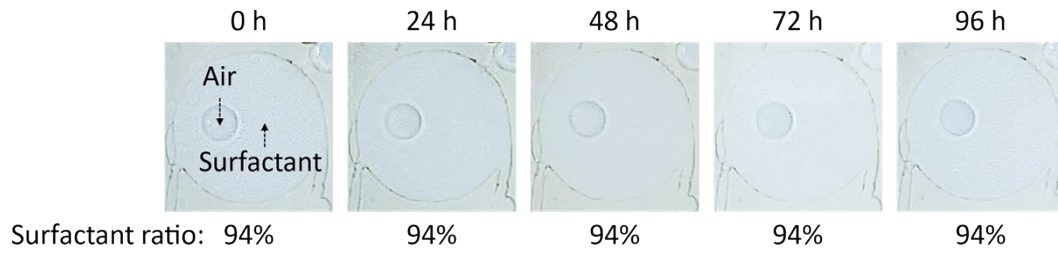

**Supplementary Fig. 2.** Optical images to demonstrate the preservation of surfactant over time. Surfactant ratio maintains at the same level for 96 hours.

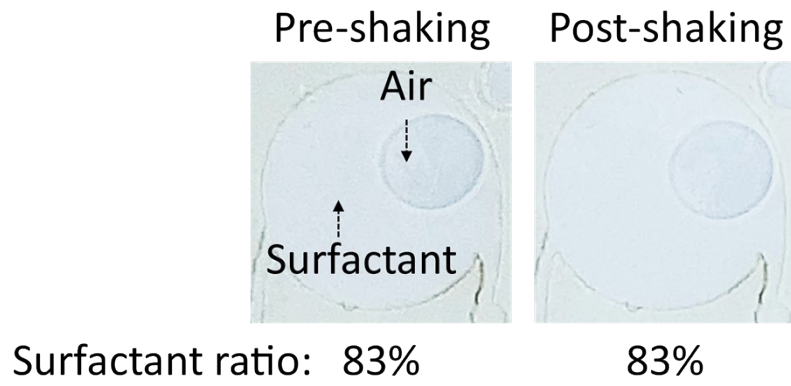

**Supplementary Fig. 3.** Optical images to demonstrate the preservation of surfactant within the device under shaking. Surfactant ratio maintains at the same level before and after shaking (1000 rpm) of 2 hours.
